# Supplementary material
Source: PubMed Central journal article supplement (PMC10231239)
Supplement: ehp11807.s001.acco.pdf [file ehp11807.s001.acco.pdf]

*Environ Health Perspect*

DOI: 10.1289/EHP11807

**Note to readers with disabilities:** *EHP* strives to ensure that all journal content is accessible to all readers. However, some figures and Supplemental Material published in *EHP* articles may not conform to [508 standards](#) due to the complexity of the information being presented. If you need assistance accessing journal content, please contact [ehp508@niehs.nih.gov](mailto:ehp508@niehs.nih.gov). Our staff will work with you to assess and meet your accessibility needs within 3 working days.

### **Supplemental Material**

#### **Humidity's Role in Heat-Related Health Outcomes: A Heated Debate**

Jane W. Baldwin, Tarik Benmarhnia, Kristie L. Ebi, Ollie Jay, Nicholas J. Lutsko, and Jennifer K. Vanos

#### **Table of Contents**

**Additional File-** Excel Document
